# Supplementary material for: Eosinopenia as a diagnostic marker of bloodstream infection in a general internal medicine setting: a cohort study
Source: PubMed Central journal article supplement (PMC6990586; doi:10.1186/s12879-020-4814-5), 2020-01-30
Supplement: 12879_2020_4814_MOESM1_ESM.pdf [file 12879_2020_4814_MOESM1_ESM.pdf]

| Variable                  | Bloodstream infection<br>(n = 25) | No bloodstream infection<br>(n = 164) |
|---------------------------|-----------------------------------|---------------------------------------|
| Autoimmune                | 0                                 | 6                                     |
| Asthma                    | 2                                 | 4                                     |
| Pancreatitis              | 0                                 | 2                                     |
| Cytotoxic chemotherapy    | 0                                 | 2                                     |
| Trauma                    | 0                                 | 0                                     |
| Recent surgery            | 0                                 | 0                                     |
| Gastrointestinal bleeding | 0                                 | 0                                     |
| Rhinitis                  | 0                                 | 0                                     |
| Atopic dermatitis         | 0                                 | 0                                     |
